# Supplementary material
Source: PubMed Central journal article supplement (PMC3361761)
Supplement: supp_185.5.508_Miller_ODS.pdf [file supp_185.5.508_Miller_ODS.pdf]

**A mechanistic role for type III interferon- $\lambda_1$  in asthma  
exacerbations mediated by human rhinoviruses**

E. Kathryn Miller; Johanna Zea Hernandez; Vera Wimmenauer; Bryan E. Shepherd; Diego Hijano; Romina Libster; M. Elina Serra; Niranjan Bhat; Juan P. Batalle; Yassir Mohamed; Andrea Reynaldi; Andrea Rodriguez; Monica Otello; Nestor Pisapia; Jimena Bugna; Miguel Bellabarba; David Kraft; Silvina Coviello; F. Martin Ferolla; Aaron Chen; Stephanie J. London; George K. Siberry; John V. Williams; Fernando P. Polack

**ONLINE DATA SUPPLEMENT**

## Supplemental Methods.

***In vitro infection of primary nasal epithelial cells.*** Primary nasal epithelial cells were collected midturbinate using flocked swabs (Copan). Cells were eluted in 4ml of small airways epithelial cell growth media (SAGM) with supplements of 2ml of bovine pituitary extract, 0.5ml of insulin, 0.5ml of hydrocortisone, 0.5ml of gentamicin, 0.5ml of retinoic acid, 5ml of bovine serum albumin fatty acid-free, 0.5ml of transferrin, 0.5ml of triiodothyronine, 0.5ml of human epidermal growth factor and 0.5ml of epinephrine (Lonza). The media was supplemented with 1% amphotericin-B (Sigma) and 2% heat inactivated fetal bovine serum (FBS, Atlanta Biological Inc). Cells were cultured in T25 tissue culture flasks with 2% SAGM media until 80-90% confluent, and then split into 24 well plates. Cells were incubated at 37°C and media changed every two days until cells reached 80-90% confluence. Virus was grown in MRC-5 cells, harvested, and frozen in aliquots. MRC-5 cells were grown and prepared identically to virus production for use as control. Four hours prior to infection, supernatant was poured off and fresh media (2% SAGM) was added. Twelve wells were infected with 100µl/well of HRV16A at  $2.1 \times 10^4$  pfu/ml and 12 wells with inoculated with MRC-5 supernatant as control. Plates were rocked at room temperature for 1 hour, 1ml/well of fresh media (2%SAGM) was added, supernatant was collected, and cells were placed in lysis buffer (Roche). This was designated time point 0. The remaining wells were then

incubated at 37°C and supernatants and cell fractions collected at 1.5, 24 and 48 hours. 24-well plates of A549 cells were also grown in parallel. Twelve wells were infected with HRV16A strain and 12 with MRC-5 supernatant as above, and supernatant and cells were collected at time points 0, 1.5, 24 and 48 hours. Cells were placed in lysis buffer and RNA was extracted using MagnaPure (Roche). Real-time RT-PCR for HRV was performed as previously described. Cytokine supernatant proteins were analyzed by ELISA (R&D Systems DY1598B) and mRNA was measured using real-time RT-PCR (Applied Biosystems 438739M).

### **Supplementary Table 1. Socioeconomic status in study participants.**

|                                                |    |
|------------------------------------------------|----|
| <b>Population under the poverty line * (%)</b> | 71 |
| <b>Household overcrowding ** (%)</b>           | 59 |
| <b>Public water system (%)</b>                 | 79 |
| <b>Sewer drain in house (%)</b>                | 42 |
| <b>Literacy in parents (%)</b>                 |    |
| <b>-Complete elementary school</b>             | 63 |
| <b>-Complete high school</b>                   | 23 |

\* income less than US\$ 161/month

\*\* more than three people per room

#### References:

1. National Institute of Statistics and Census, Ministry of Economy, Argentina. Censo nacional de población, hogares y viviendas. 2001.
2. Latinoamerican Foundation of Economic Research. Valorización de la canasta básica alimentaria y canasta básica total. 2010.

**Supplementary Table 2. Baseline asthma status.\***

|                            | <b>Days with Symptoms</b> | <b>Nights with Symptoms</b> | <b>FEV1</b> |
|----------------------------|---------------------------|-----------------------------|-------------|
| <b>Severe Persistent</b>   | Continual                 | Frequent                    | $\leq 60\%$ |
| <b>Moderate Persistent</b> | Daily                     | $\geq 5$ /month             | 60-80%      |
| <b>Mild Persistent</b>     | 3-6/week                  | 3-4/month                   | $\geq 80\%$ |
| <b>Mild Intermittent</b>   | $\leq 2$ /week            | $\leq 2$ /month             | $\geq 80\%$ |

\*From the National Asthma Education and Prevention Program of the National Heart, Lung, and Blood Institute, and the National Center for Environmental Health of the Centers for Disease Control and Prevention MMWR: Recommendations and Reports, Vol. 52/No. RR-6, March 28, 2003.

**Supplementary Table 3. Modified functionalized Global Initiative for Asthma (GINA) asthma exacerbation severity scheme.**

|                                                                             | <b>Mild</b>                                        | <b>Moderate</b>                                     | <b>Severe</b>                                     | <b>Respiratory Arrest Imminent</b>    |
|-----------------------------------------------------------------------------|----------------------------------------------------|-----------------------------------------------------|---------------------------------------------------|---------------------------------------|
| <b>Breathlessness</b>                                                       | When walking<br>Can lie down<br>Talks in sentences | When talking<br>Prefers sitting<br>Talks in phrases | At rest<br>Sits hunched forward<br>Talks in words | At rest<br>Difficult to speak         |
| <b>Respiratory Rate</b><br>Normal:<br>1-5 years <40/min<br>>6 years <30/min | Increased                                          | Increased                                           | Increased                                         | Decreased                             |
| <b>Alertness</b>                                                            |                                                    | Agitated                                            | Agitated                                          | Drowsy,<br>unresponsive,<br>somnolent |
| <b>Accessory Muscle Use</b>                                                 | No                                                 | Yes                                                 | Yes                                               |                                       |
| <b>Wheeze</b>                                                               | Expiratory Only                                    | Inspiratory and expiratory                          | Inspiratory and expiratory                        | None                                  |
| <b>Pulse/min</b>                                                            | <100                                               | 100-120                                             | >120                                              | Bradycardia                           |
| <b>SaO2 on Room Air*</b>                                                    | >95%                                               | 91-95%                                              | <90%                                              |                                       |

**\*PaO<sub>2</sub>/PaCO<sub>2</sub> and post-treatment FEV<sub>1</sub> were not assessed in all patients and thus were not include in modified score.**

**Based on the 2006 GINA report: [www.ginasthma.org](http://www.ginasthma.org).**

**Supplementary Table 4. Allergy Specific IgE Test System (MyAllergyTest® System) for measurement of Serum-specific IgE antibodies to 10 common allergens.**

| <b>Aeroallergens Tested</b>  |
|------------------------------|
| Timothy Grass                |
| Bermuda Grass                |
| Mountain Cedar               |
| Short Ragweed                |
| Alternaria (mold)            |
| Cat Hair                     |
| Mite (pteronysinus)          |
| <b>Food Allergens Tested</b> |
| Milk                         |
| Egg White                    |
| Wheat                        |

**Supplementary Table 5. Comparison of epidemiologic and clinical characteristics between patients analyzed for IFN- $\lambda$ 1 or not.**

|                               | <i>All Children</i> | <i>All Children</i>                                           |                                                           |         |
|-------------------------------|---------------------|---------------------------------------------------------------|-----------------------------------------------------------|---------|
|                               | (n=409)             | Children not analyzed for IFN- $\lambda$ <sub>1</sub> (n=212) | Children analyzed for IFN- $\lambda$ <sub>1</sub> (n=197) | p-value |
| Age                           | 8.77                | 8.46 (8.07, 8.84)                                             | 9.11 (8.71, 9.51)                                         | 0.020   |
| Female                        | 174 (42.54%)        | 83 (39.15%)                                                   | 91 (46.19%)                                               | 0.150   |
| Baseline Severity             |                     |                                                               |                                                           |         |
| Mild Intermittent             | 99 (24.21%)         | 42 (19.81%)                                                   | 57 (28.93%)                                               | 0.056   |
| Mild Persistent               | 132 (32.27%)        | 66 (31.33%)                                                   | 66 (33.50%)                                               |         |
| Moderate                      | 167 (40.80%)        | 99 (46.70%)                                                   | 68 (34.52%)                                               |         |
| Severe                        | 11 (2.61%)          | 5 (2.36%)                                                     | 6 (3.05%)                                                 |         |
| Prior Asthma Hospitalizations |                     |                                                               |                                                           |         |
| 0                             | 156 (38.24%)        | 87 (41.04%)                                                   | 69 (35.03%)                                               | 0.443   |
| 1                             | 53 (12.99%)         | 27 (12.74%)                                                   | 26 (13.20%)                                               |         |
| $\geq 2$                      | 199 (48.77%)        | 98 (46.23%)                                                   | 102 (51.78%)                                              |         |
| Wheezing                      |                     |                                                               |                                                           |         |
| Yes                           | 200 (48.90%)        | 101 (47.64%)                                                  | 99 (50.25%)                                               | 0.597   |
| No                            | 209 (51.10%)        | 111 (52.36%)                                                  | 98 (49.75%)                                               |         |
| Mother with asthma            | 69 (16.87%)         | 32 (15.09%)                                                   | 37 (18.78%)                                               | 0.320   |
| Mother with allergies         | 55 (13.45%)         | 30 (14.15%)                                                   | 25 (12.69%)                                               | 0.665   |
| Human Rhinovirus positive     | 180 (46.04%)        | 90 (46.39%)                                                   | 90 (45.69%)                                               | 0.889   |
